# Supplementary material for: In planta production of ELPylated spidroin-based proteins results in non-cytotoxic biopolymers
Source: PubMed Central journal article supplement (PMC4343268; doi:10.1186/s12896-015-0123-2), 2015-02-19

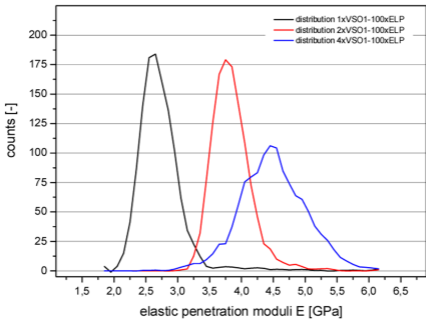

Supplement: 12896_2015_123_MOESM1_ESM.pdf [file 12896_2015_123_MOESM1_ESM.pdf]
